# Supplementary material for: Bovine Lactoferrin Inhibits Dengue Virus Infectivity by Interacting with Heparan Sulfate, Low-Density Lipoprotein Receptor, and DC-SIGN
Source: MDPI journal article supplement (doi:10.3390/ijms18091957), 2017-09-12
Supplement: s1 [file s1]

## Supplementary File 1

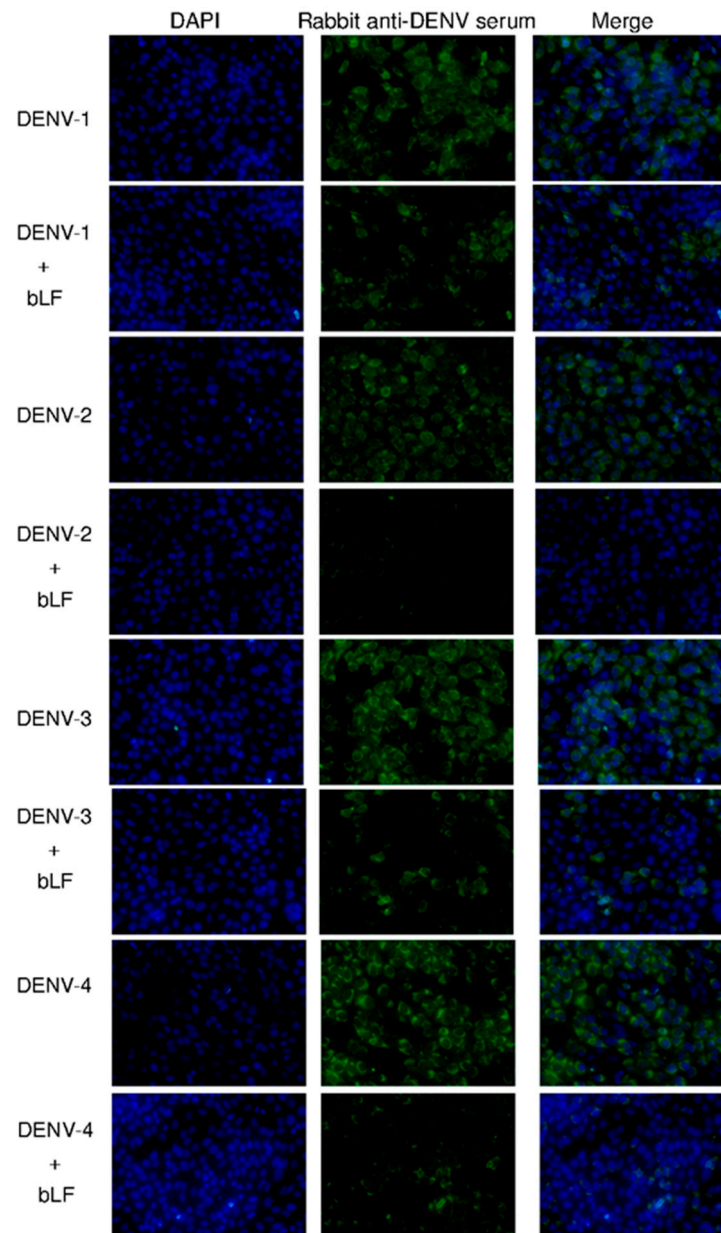

**Supplementary Figure 1.** Inhibitory effect of bLF against DENV-1-4 infection. Vero cell monolayers were infected with DENV1-4 at a MOI of 5, with or without bLF (200  $\mu$ g/ml). After 24 hours, the cells were fixed and stained with DAPI and rabbit anti-DENV-1-4 antibodies, followed by goat anti-rabbit Alexa Fluor 488-conjugated secondary antibody. Images were observed and captured by fluorescent microscope.
